# Supplementary material for: Uncovering perturbations in human hematopoiesis associated with healthy aging and myeloid malignancies at single-cell resolution
Source: eLife. 2023 Jan 11;12:e79363. doi: 10.7554/eLife.79363 (PMC9904760; doi:10.7554/eLife.79363)
Supplement: Supplementary file 5. [file elife-79363-supp5.xlsx]

## Sheet: Sheet1
Supplemental Table S5: Clinical characteristics of patients
Sample	Age (years)	Type of disease (WHO classification)	Moment of the sample	Karyotype	Mutations (%VAF)	Hemoglobin (g/dL)	Platelets (x109/L)	Leukocytes (x109/L)	Neutrophils (x109/L)	% Blasts in bone marrow
MDS1	71	MDS-MLD	Diagnosis	46,XY,del(20)(q12)[28/30]/46,XY[2/30]	ZRSR2 (44%), CUX1 (24%)	13.3	84	1.4	0.35	0
MDS2	54	MDS-MLD	Diagnosis	46, XX [20]	TET2 (44%), IDH2 (42%), U2AF1 (41%), ASXL1 (36%), PHF6 (27%), CBL (6%)	9.9	80	3.27	1.53	0
MDS3	83	MDS-MLD	Diagnosis	46,XX,del(9)(q13q33)[5]/46,XX,del(16)(q13q33)[5]/46,XX[4]	ASXL1 (68.7%), U2AF1 (37.7%)	9.3	3,9x10-4	6.52	4.7	1
MDS4	83	MDS-MLD	Diagnosis	46,XY[20]	TET2 (2.6%)	7.9	163	10.12	7.9	4
Young1	20
Young2	23
Young3	20
Young4	19
Young5	23
Elderly1	61
Elderly2	74
Elderly3	72
